# Supplementary material for: Selective and low potential electrocatalytic oxidation and sensing ofl-cysteine using metal impurity containing carbon black modified electrode
Source: Royal Society of Chemistry journal article supplement (doi:10.1039/c7ay02251d), 2017-01-01
Supplement: c7ay02251d1.pdf [file c7ay02251d1.pdf]

## Supporting Information

### Selective and low potential electrocatalytic oxidation and sensing of L-Cysteine using metal impurity containing carbon black modified electrode

Sundaram Sornambikai<sup>a</sup>, Mohammed Rafiq Abdul Kadir<sup>b</sup>, Annamalai Senthil Kumar<sup>c</sup>,  
Nagamony Ponpandian<sup>a</sup>, Chinnuswamy Viswanathan<sup>a\*</sup>

<sup>a</sup>Department of Nanoscience and Technology, Bharathiar University, Coimbatore 641046,  
Tamil Nadu, India

<sup>b</sup>Medical Devices and Technology Group (MEDITEG), Universiti Teknologi Malaysia  
(UTM), 81310 Skudai, Johor Bahru,, Malaysia.

<sup>c</sup>Nano and Bioelectrochemistry Research Laboratory, Department of Chemistry and Carbon  
Dioxide Research and Green Technology Centre, Vellore Institute of Technology University,  
Vellore-632014, India.

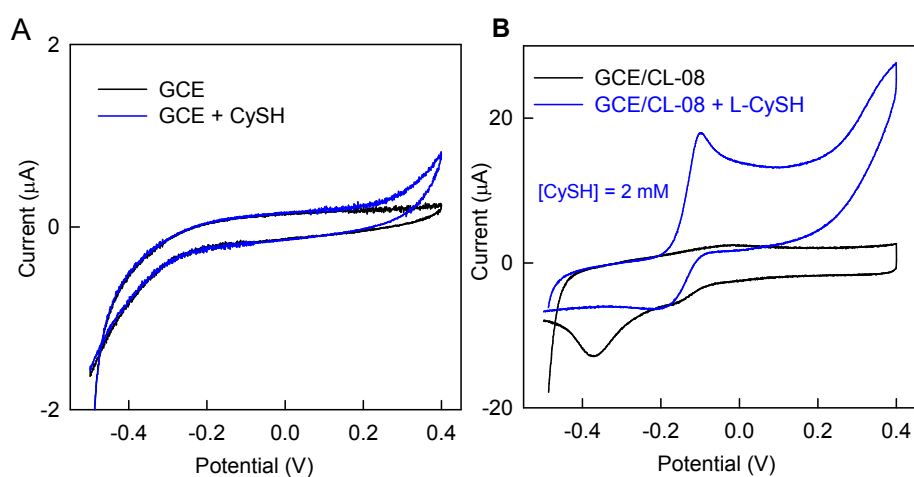

**Figure S1.** CV responses of A) GCE and B) GCE/CL-08 in the absence and presence of 2 mM L-CySH in the optimal potential window -0.5 to 0.4 V vs Ag/AgCl in pH 6.65 PBS at  $v = 10 \text{ mV s}^{-1}$ .

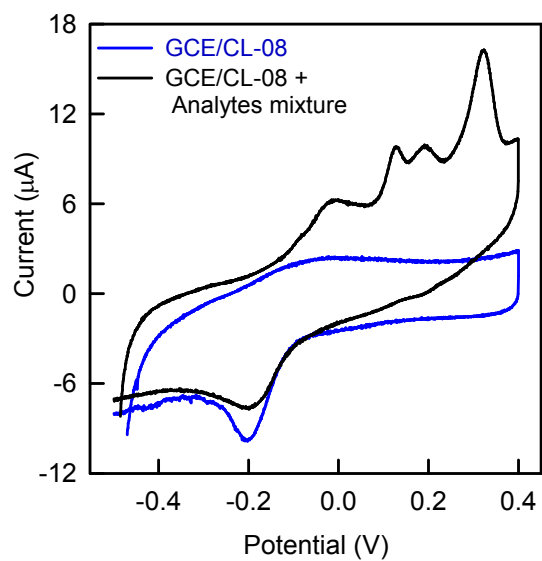

**Figure S2.** CV responses of GCE/CL-08 in the absence and presence of mixture of 1 mM of analytes in the optimal potential window at  $\nu = 10 \text{ mV s}^{-1}$ .
